# Supplementary material for: Modulating singlet fission through interchromophoric rotation
Source: Royal Society of Chemistry journal article supplement (doi:10.1039/d2cp01116f), 2022-01-01
Supplement: d2cp01116f1.pdf [file d2cp01116f1.pdf]

# Modulating Singlet Fission through Interchromophoric Rotation

Sohan D. Jadhav, Devika Sasikumar and Mahesh Hariharan\*

School of Chemistry, Indian Institute of Science Education and Research Thiruvananthapuram  
(IISER- TVM), Maruthamala P.O., Vithura, Thiruvananthapuram 695551, Kerala, India

## Electronic Supplementary Information (ESI)

### Contents

|                                                                                                                                                                                                                                                 |           |
|-------------------------------------------------------------------------------------------------------------------------------------------------------------------------------------------------------------------------------------------------|-----------|
| <b>Section A : Methods and Materials.....</b>                                                                                                                                                                                                   | <b>S2</b> |
| ○ Computational methods.....                                                                                                                                                                                                                    | S2        |
| ○ Estimation of energy of the charge transfer state.....                                                                                                                                                                                        | S2        |
| ○ Transition charge method using the transition charge from electrostatic potential (TrESP).....                                                                                                                                                | S3        |
| <b>Section B : Tables.....</b>                                                                                                                                                                                                                  | <b>S3</b> |
| ○ <b>Table S1.</b> Effective excitonic coupling, effective energies, $\Delta E_{SF}$ and effective SF coupling at all rotational offsets for long-axis displacement $x = 0.6 \text{ \AA}$ .....                                                 | S3        |
| ○ <b>Table S2.</b> Effective excitonic coupling, effective energies, $\Delta E_{SF}$ and effective SF coupling at all rotational offsets for long-axis displacement $x = 1.6 \text{ \AA}$ .....                                                 | S4        |
| <b>Section C : Figures.....</b>                                                                                                                                                                                                                 | <b>S5</b> |
| ○ <b>Figure S1.</b> (a) TD-DFT calculated $S_1$ state in terrylene that corresponds entirely to the transition between the HOMO and LUMO frontier molecular orbitals. (b) TD-DFT calculated natural transition orbitals of the $T_1$ state..... | S5        |
| ○ <b>Figure S2.</b> Terrylene dimer model with interplanar distance fixed for the calculations.....                                                                                                                                             | S5        |
| ○ <b>Figure S3.</b> Transfer integrals or Fock (one-electron coupling) matrix elements (in meV).....                                                                                                                                            | S6        |

- **Figure S4.** 2D mapping of the charge transfer state energy  $E_{CT}$  (in meV) as a function of rotation angle and long axis displacement.....S6
- **Figure S5.** Absolute values of transfer integrals or Fock (one-electron coupling) matrix elements (in meV).....S7

**Section D: References.....S7**

## Section A : Materials and Methods

### Computational methods

All calculations were carried out with the CAM-B3LYP functional<sup>1</sup> and the 6-31G\* basis set using Gaussian 16.<sup>2</sup> CAM-B3LYP was preferred over B3LYP considering the improved performance of the long-range correction in handling excited states especially with a large charge transfer (CT) component.<sup>3</sup> The terrylene monomer was geometry optimised and placed at specific long axis displacements and rotations using Avogadro 1.2.0.<sup>4,5</sup>

The charge transfer integrals (coupling matrix elements) were calculated using the CATNIP tool version 1.9<sup>6</sup> using the output of energy calculations of the monomers and dimers from Gaussian 16.<sup>2</sup> The wavefunctions should be orthogonal for accurate magnitudes of charge transfer coupling.<sup>7</sup> Natural transition orbitals (NTOs) were generated using Multiwfn 3.7.<sup>8</sup> Calculations of all quantities and subsequent generation of the 2D mappings were carried out utilizing the NumPy and Matplotlib libraries on Python.

### Estimation of energy of the charge transfer state

The energy of the charge transfer state were estimated using the equation<sup>9,10</sup>

$$E_{CT} = IP - EA + V_{coul} \quad (\text{eq S1})$$

Ionisation potential (IP) and electron affinity (EA) were evaluated from the single point energies of the geometry-optimised neutral monomer, cation and anion of terrylene.

$$IP = E_{cation} - E_{neutral}$$

$$EA = E_{neutral} - E_{anion}$$

$V_{coul}$  is the Coulomb interaction between the Mülliken atomic charges of the anion and cation evaluated using the expression,

$$V_{coul} = \frac{1}{4\pi\epsilon_0} \sum_i \sum_j \frac{q_i q_j}{|r_i - r_j|} \quad (\text{eq S2})$$

where  $q_i$  ( $q_j$ ) is the Mülliken charge on atom  $i$  (atom  $j$ ) of monomer 1 (monomer 2) in a dimer. Likewise,  $r_i$  ( $r_j$ ) represents the position vectors of atom  $i$  (atom  $j$ ) of monomer 1 (monomer 2) in a dimer. The Mülliken charges were obtained from the respective Gaussian output files.

### Transition charge method using the transition charge from electrostatic potential (TrESP)

For closely packed chromophoric frameworks, accurate values of the Coulombic coupling  $J_{coul}$  can be obtained through the transition charge method using TrESP.<sup>11</sup>  $J_{coul}$  was evaluated for the  $S_1 \leftarrow S_0$  transition by replacing the Mülliken charges with transition charges in eq S2. The calculation was implemented in the Multiwfn 3.7 program package.<sup>8</sup>

## Section B : Tables

**Table S1.** Effective excitonic coupling, effective energies,  $\Delta E_{SF}$  and effective SF coupling at all rotational offsets for long-axis displacement  $x = 0.6 \text{ \AA}$ . All values are in meV.

| $\theta$ | $\Delta E_{FE}$ | $\Delta E_{TT}$ | $ J_{eff} $ | $E'_{FE}$ | $E'_{FE} -  J_{eff} $ | $E'_{TT}$ | $\Delta E_{SF}$ | $ V'_{SF} $ |
|----------|-----------------|-----------------|-------------|-----------|-----------------------|-----------|-----------------|-------------|
| 0°       | 1253.90         | 465.27          | 1381.64     | 1036.10   | -345.53               | 1734.73   | 2080.27         | 766.54      |
| 5°       | 1075.74         | 424.53          | 1212.12     | 1214.26   | 2.14                  | 1775.47   | 1773.34         | 677.78      |
| 10°      | 658.66          | 321.54          | 809.66      | 1631.34   | 821.68                | 1878.46   | 1056.77         | 461.04      |
| 15°      | 257.76          | 194.82          | 411.70      | 2032.24   | 1620.54               | 2005.18   | -384.64         | 224.75      |
| 20°      | 45.14           | 80.83           | 192.56      | 2244.86   | 2052.30               | 2119.17   | -66.87          | 60.97       |
| 25°      | 0.04            | 11.24           | 140.62      | 2289.96   | 2149.34               | 2188.76   | -39.42          | 0.36        |
| 30°      | 14.53           | 6.12            | 139.66      | 2275.47   | 2135.81               | 2193.88   | -58.07          | 8.42        |
| 35°      | 28.84           | 62.28           | 125.66      | 2261.16   | 2135.50               | 2137.72   | -2.22           | 31.23       |
| 40°      | 34.26           | 163.80          | 119.86      | 2255.74   | 2135.88               | 2036.20   | 99.68           | 39.64       |
| 45°      | 34.87           | 299.38          | 107.36      | 2255.13   | 2147.77               | 1900.62   | 247.15          | 51.25       |
| 50°      | 43.60           | 450.70          | 126.63      | 2246.40   | 2119.77               | 1749.30   | 370.48          | 97.45       |
| 55°      | 78.92           | 577.20          | 164.04      | 2211.08   | 2047.04               | 1622.80   | 424.24          | 182.52      |

|            |        |        |        |         |         |         |        |        |
|------------|--------|--------|--------|---------|---------|---------|--------|--------|
| <b>60°</b> | 140.44 | 631.75 | 210.86 | 2149.56 | 1938.70 | 1568.25 | 370.45 | 272.51 |
| <b>65°</b> | 201.72 | 590.66 | 249.48 | 2088.28 | 1838.80 | 1609.34 | 229.46 | 322.10 |
| <b>70°</b> | 227.41 | 467.82 | 153.31 | 2062.59 | 1909.27 | 1732.18 | 177.09 | 305.11 |
| <b>75°</b> | 202.53 | 304.64 | 228.63 | 2087.47 | 1858.84 | 1895.36 | -36.52 | 229.22 |
| <b>80°</b> | 140.27 | 149.27 | 165.67 | 2149.73 | 1984.07 | 2050.73 | -66.67 | 127.31 |
| <b>85°</b> | 77.59  | 40.53  | 85.54  | 2212.41 | 2126.87 | 2159.47 | -32.60 | 42.58  |
| <b>90°</b> | 51.50  | 1.76   | 0.00   | 2238.50 | 2238.50 | 2198.24 | 40.26  | 9.86   |

**Table S2.** Effective excitonic coupling, effective energies,  $\Delta E_{SF}$  and effective SF coupling at all rotational offsets for long-axis displacement  $x = 1.6 \text{ \AA}$ . All values are in meV.

| $\theta$   | $\Delta E_{FE}$ | $\Delta E_{TT}$ | $ J_{eff} $ | $E'_{FE}$ | $E'_{FE} -  J_{eff} $ | $E'_{TT}$ | $\Delta E_{SF}$ | $ V'_{SF} $ |
|------------|-----------------|-----------------|-------------|-----------|-----------------------|-----------|-----------------|-------------|
| <b>0°</b>  | 425.52          | 331.99          | 270.13      | 1864.48   | 1594.35               | 1868.01   | -273.67         | 44.20       |
| <b>5°</b>  | 376.50          | 310.67          | 228.59      | 1913.50   | 1684.91               | 1889.33   | -204.42         | 16.73       |
| <b>10°</b> | 264.22          | 251.94          | 121.43      | 2025.78   | 1904.35               | 1948.06   | -43.71          | 35.34       |
| <b>15°</b> | 152.25          | 167.21          | 2.81        | 2137.75   | 2134.94               | 2032.79   | 102.15          | 59.19       |
| <b>20°</b> | 71.99           | 76.84           | 85.73       | 2218.01   | 2132.28               | 2123.16   | 9.12            | 37.73       |
| <b>25°</b> | 22.42           | 14.39           | 146.69      | 2267.58   | 2120.89               | 2185.61   | -64.72          | 2.87        |
| <b>30°</b> | 8.77            | 7.57            | 120.77      | 2281.23   | 2160.46               | 2192.43   | -31.97          | 1.47        |
| <b>35°</b> | 32.12           | 59.43           | 144.97      | 2257.88   | 2112.91               | 2140.57   | -27.66          | 40.77       |
| <b>40°</b> | 71.15           | 166.64          | 35.70       | 2218.85   | 2183.15               | 2033.36   | 149.79          | 110.70      |
| <b>45°</b> | 97.02           | 328.54          | 194.02      | 2192.98   | 1998.96               | 1871.46   | 127.50          | 170.79      |
| <b>50°</b> | 98.29           | 513.63          | 183.33      | 2191.71   | 2008.38               | 1686.37   | 322.01          | 191.31      |
| <b>55°</b> | 80.27           | 652.78          | 151.94      | 2209.73   | 2057.78               | 1547.22   | 510.57          | 167.63      |
| <b>60°</b> | 55.48           | 686.24          | 114.23      | 2234.52   | 2120.29               | 1513.76   | 606.53          | 119.02      |
| <b>65°</b> | 32.73           | 604.39          | 80.28       | 2257.27   | 2177.00               | 1595.61   | 581.39          | 67.90       |
| <b>70°</b> | 16.02           | 447.10          | 35.62       | 2273.98   | 2238.36               | 1752.90   | 485.47          | 29.21       |
| <b>75°</b> | 6.00            | 271.88          | 35.98       | 2284.00   | 2248.02               | 1928.12   | 319.90          | 7.53        |
| <b>80°</b> | 1.47            | 125.47          | 22.58       | 2288.53   | 2265.96               | 2074.53   | 191.43          | 0.31        |
| <b>85°</b> | 0.17            | 32.55           | 11.13       | 2289.83   | 2278.70               | 2167.45   | 111.25          | 0.80        |
| <b>90°</b> | 0.02            | 1.18            | 0.00        | 2289.98   | 2289.98               | 2198.82   | 91.16           | 0.15        |

## Section C : Figures

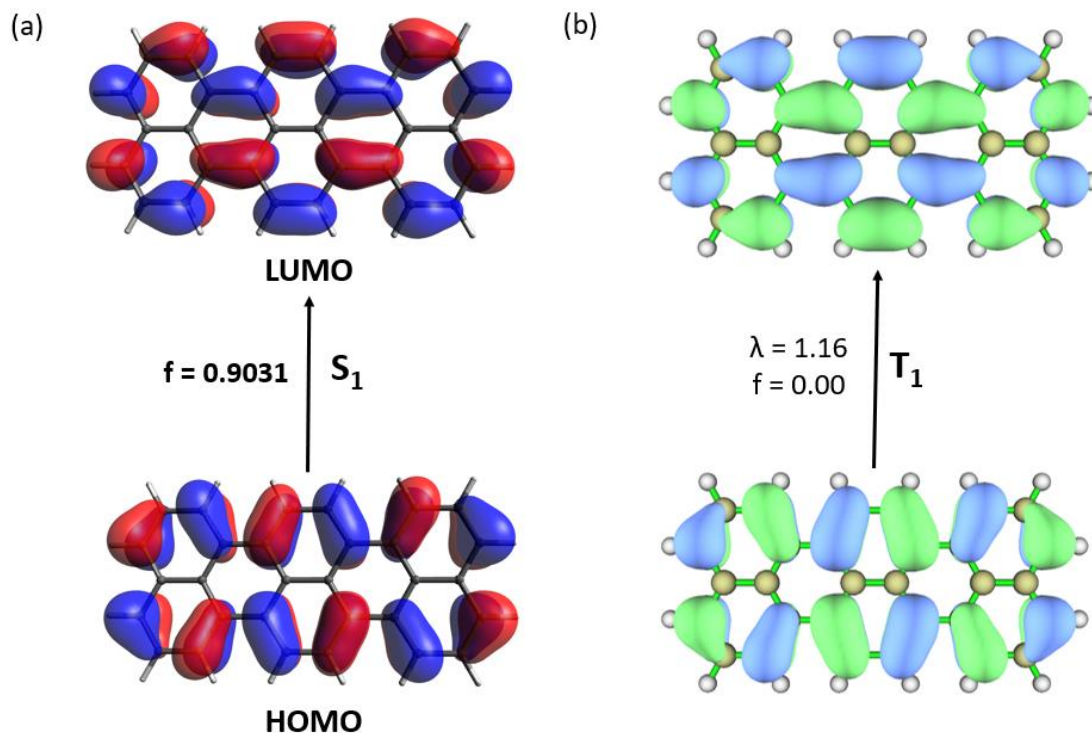

**Figure S1.** (a) TD-DFT calculated  $S_1$  state in terrylene that corresponds entirely to the transition between the HOMO and LUMO frontier molecular orbitals (FMOs). (b) TD-DFT calculated NTOs i.e., orbitals involved in hole-particle excitation of the  $T_1$  state (involves contribution from multiple orbitals) where  $\lambda$  is the weightage of the NTO and  $f$  is the oscillator strength. (isovalue = 0.02)

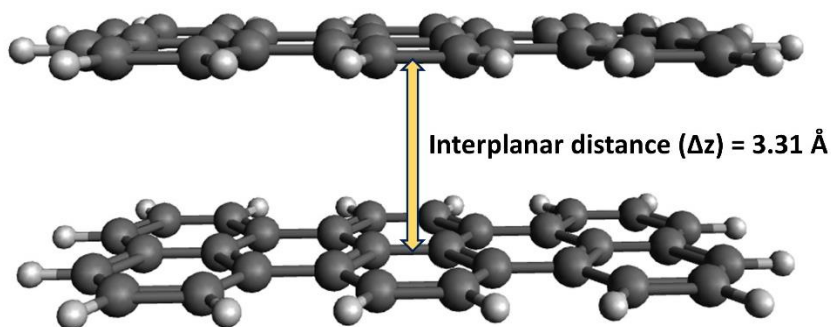

**Figure S2.** Terrylene dimer model with interplanar distance fixed for the calculations.

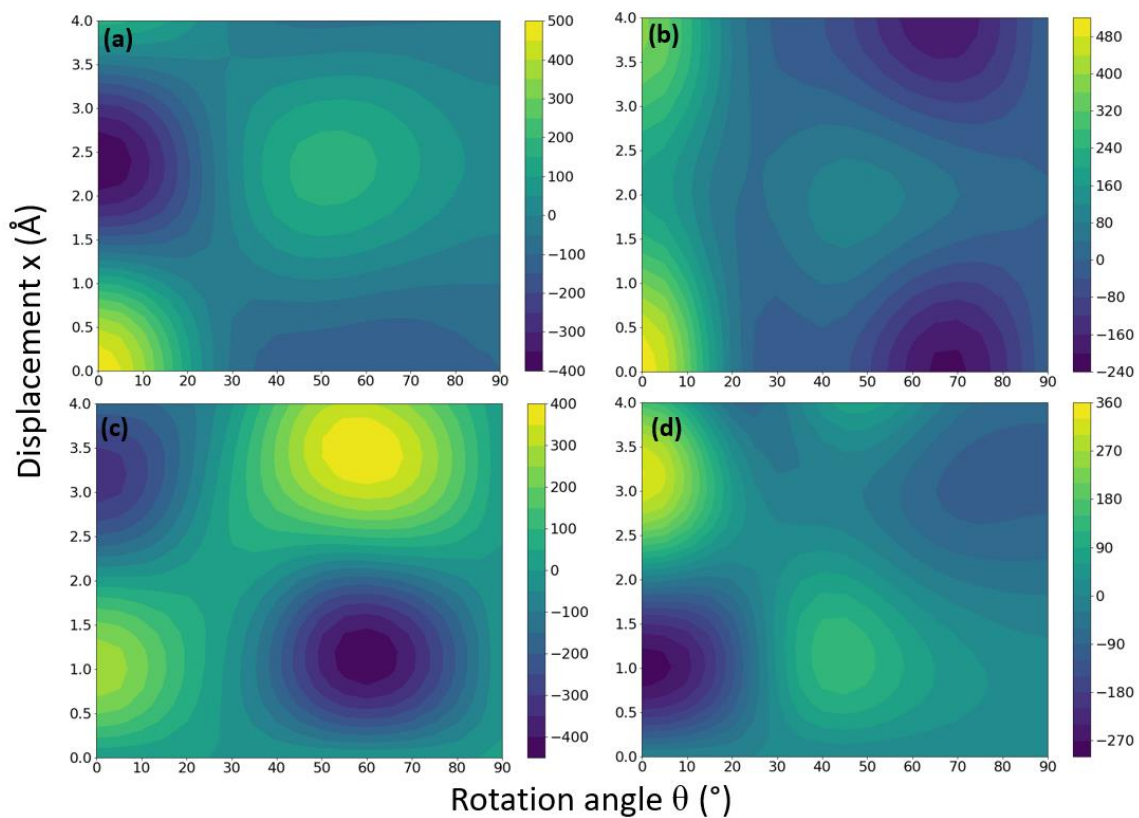

**Figure S3.** Transfer integrals or Fock (one-electron coupling) matrix elements (in meV).

(a)  $F_{HH}$  (b)  $F_{LL}$  (c)  $F_{HL}$  (d)  $F_{LH}$

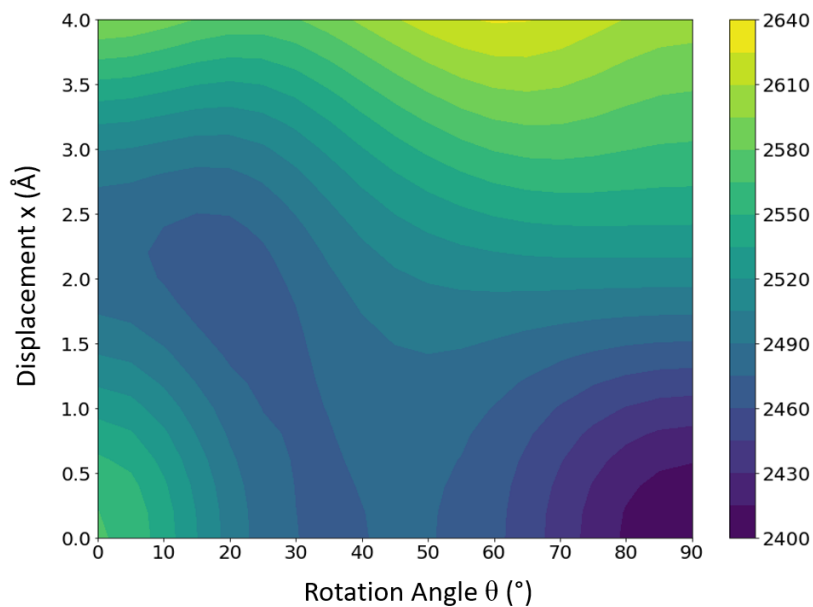

**Figure S4.** 2D mapping of the charge transfer state energy  $E_{CT}$  (in meV) as a function of rotation angle and long axis displacement.

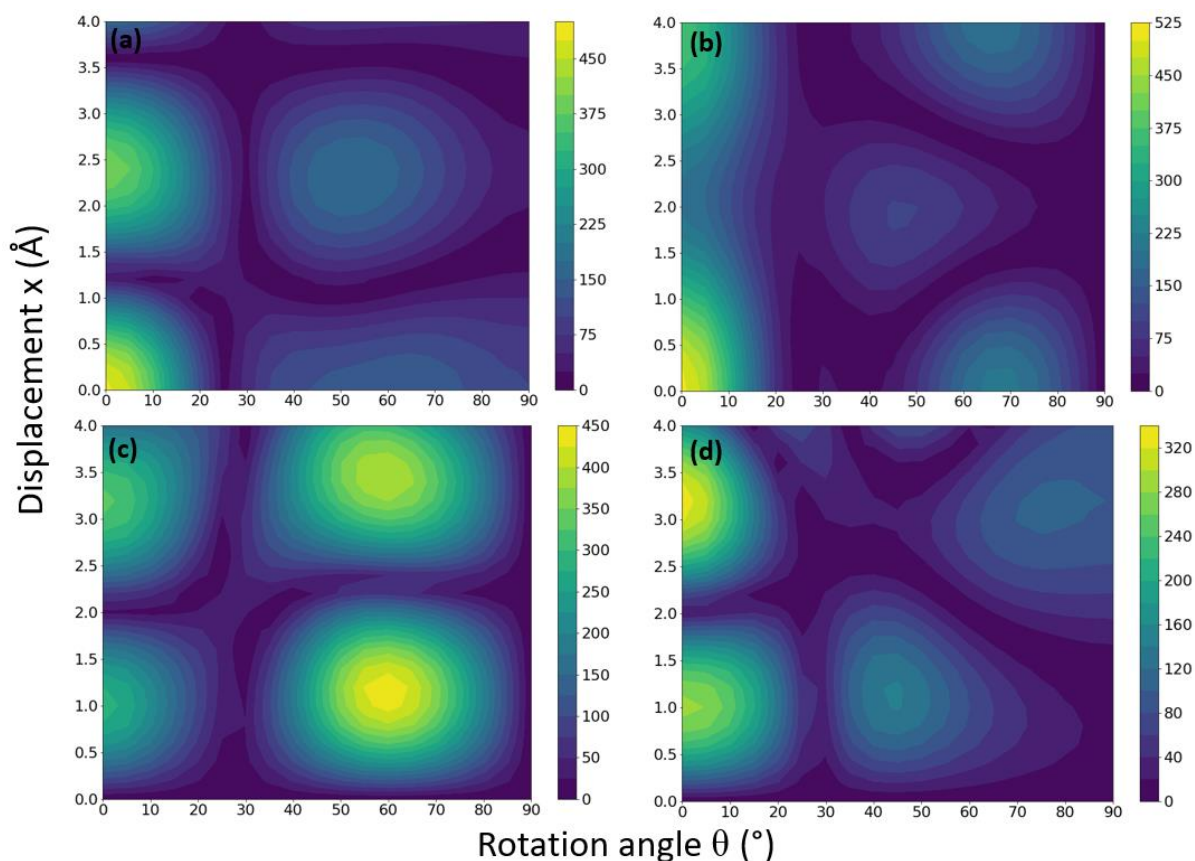

**Figure S5.** Absolute values of transfer integrals or Fock (one-electron coupling) matrix elements (in meV). (a)  $|F_{HH}|$  (b)  $|F_{LL}|$  (c)  $|F_{HL}|$  (d)  $|F_{LH}|$

## Section D: References

- 1 T. Yanai, D. P. Tew and N. C. Handy, A new hybrid exchange–correlation functional using the Coulomb-attenuating method (CAM-B3LYP), *Chem. Phys. Lett.*, 2004, **393**, 51–57.
- 2 M. J. Frisch, G. W. Trucks, H. B. Schlegel, G. E. Scuseria, M. A. Robb, J. R. Cheeseman, G. Scalmani, V. Barone, G. A. Petersson, H. Nakatsuji, X. Li, M. Caricato, A. V. Marenich, J. Bloino, B. G. Janesko, R. Gomperts, B. Mennucci, H. P. Hratchian, J. V. Ortiz, A. F. Izmaylov, J. L. Sonnenberg, D. Williams-Young, F. Ding, F. Lipparini, F. Egidi, J. Goings, B. Peng, A. Petrone, T. Henderson, D. Ranasinghe, V. G. Zakrzewski, J. Gao, N. Rega, G. Zheng, W. Liang, M. Hada, M. Ehara, K. Toyota, R. Fukuda, J. Hasegawa, M. Ishida, T. Nakajima, Y. Honda, O. Kitao, H. Nakai, T. Vreven, K. Throssell, J. A. Montgomery, Jr., J. E. Peralta, F. Ogliaro, M. J. Bearpark, J. J. Heyd, E.

- N. Brothers, K. N. Kudin, V. N. Staroverov, T. A. Keith, R. Kobayashi, J. Normand, K. Raghavachari, A. P. Rendell, J. C. Burant, S. S. Iyengar, J. Tomasi, M. Cossi, J. M. Millam, M. Klene, C. Adamo, R. Cammi, J. W. Ochterski, R. L. Martin, K. Morokuma, O. Farkas, J. B. Foresman, and D. J. Fox, Gaussian 16, Revision C.01, Gaussian, Inc., Wallingford CT, 2016
- 3 I. V. Rostov, R. D. Amos, R. Kobayashi, G. Scalmani and M. J. Frisch, Studies of the ground and excited-state surfaces of the retinal chromophore using CAM-B3LYP, *J. Phys. Chem. B*, 2010, **114**, 5547–5555.
  - 4 Avogadro: An Open-Source Molecular Builder and Visualization Tool. Version 1.2.0. [Http://Avogadro.Cc/](http://Avogadro.Cc/).
  - 5 M. D. Hanwell, D. E. Curtis, D. C. Lonie, T. Vandermeersch, E. Zurek and G. R. Hutchison, Avogadro: an advanced semantic chemical editor, visualization, and analysis platform, *J. Cheminform.*, 2012, **4**, 17.
  - 6 GitHub - JoshuaSBrown/QC\_Tools: This Small Repository Provides Functionality for Calculating the Charge Transfer Integrals between Two Molecules. [Https://Github.Com/JoshuaSBrown/QC\\_Tools](https://Github.Com/JoshuaSBrown/QC_Tools).
  - 7 E. F. Valeev, V. Coropceanu, D. A. da Silva Filho, S. Salman and J.-L. Brédas, Effect of Electronic Polarization on Charge-Transport Parameters in Molecular Organic Semiconductors, *J. Am. Chem. Soc.*, 2006, **128**, 9882–9886.
  - 8 T. Lu and F. Chen, Multiwfn: A multifunctional wavefunction analyzer, *J. Comput. Chem.*, 2012, **33**, 580–592.
  - 9 D. Casanova, Theoretical Modeling of Singlet Fission, *Chem. Rev.*, 2018, **118**, 7164–7207.
  - 10 S. Ito, T. Nagami and M. Nakano, Singlet fission in pancake-bonded systems, *Phys. Chem. Chem. Phys.*, 2017, **19**, 5737–5745.
  - 11 M. E. Madjet, A. Abdurahman and T. Renger, Intermolecular Coulomb Couplings from Ab Initio Electrostatic Potentials: Application to Optical Transitions of Strongly Coupled Pigments in Photosynthetic Antennae and Reaction Centers, *J. Phys. Chem. B*, 2006, **110**, 17268–17281.
